# Supplementary material
Source: Research Square preprint supplement (doi:10.21203/rs.3.rs-9150077/v1)
Supplement: Supplementary file 1 [file a5dc4f3b545762e88935955e.pdf]

山东大学齐鲁医院科研伦理委员会  
伦理审查批件

|                                                                                                                                                                                                                                                                                                                                                                                                                                                                                                                                                                                                                                                                                                                  |                                                                                                         |      |        |
|------------------------------------------------------------------------------------------------------------------------------------------------------------------------------------------------------------------------------------------------------------------------------------------------------------------------------------------------------------------------------------------------------------------------------------------------------------------------------------------------------------------------------------------------------------------------------------------------------------------------------------------------------------------------------------------------------------------|---------------------------------------------------------------------------------------------------------|------|--------|
| 伦理批件号                                                                                                                                                                                                                                                                                                                                                                                                                                                                                                                                                                                                                                                                                                            | KYLL-202506-112                                                                                         |      |        |
| 项目名称                                                                                                                                                                                                                                                                                                                                                                                                                                                                                                                                                                                                                                                                                                             | 血清 PROK2 水平与糖尿病及其并发症的相关性研究                                                                              |      |        |
| 项目来源及编号                                                                                                                                                                                                                                                                                                                                                                                                                                                                                                                                                                                                                                                                                                          | 自选项目                                                                                                    |      |        |
| 研究科室                                                                                                                                                                                                                                                                                                                                                                                                                                                                                                                                                                                                                                                                                                             | 内分泌与代谢病科                                                                                                |      |        |
| 项目负责人                                                                                                                                                                                                                                                                                                                                                                                                                                                                                                                                                                                                                                                                                                            | 王川                                                                                                      |      |        |
| 审查类别                                                                                                                                                                                                                                                                                                                                                                                                                                                                                                                                                                                                                                                                                                             | 初始审查                                                                                                    | 审查方式 | 简易程序审查 |
| 审查日期                                                                                                                                                                                                                                                                                                                                                                                                                                                                                                                                                                                                                                                                                                             | 2025年6月17日                                                                                              | 审查地点 | 通讯评审   |
| 审查文件                                                                                                                                                                                                                                                                                                                                                                                                                                                                                                                                                                                                                                                                                                             | 伦理审查申请表 研究经济利益声明 研究人员分工<br>研究方案（V2.0 2025年05月21日） 科学性审查证明文件<br>知情同意书（V2.0 2025年05月21日）<br>研究承诺书 研究采集计划表 |      |        |
| <p><b>审查意见：</b></p> <p>根据我国《涉及人的生物医学研究伦理审查办法》、WMA《赫尔辛基宣言》和 CIOMS《人体生物医学研究国际道德指南》的伦理原则，经本伦理委员会审查，同意按所批准的文件开展本研究。</p> <ol style="list-style-type: none"> <li>1.请遵循伦理委员会批准的方案开展临床研究，保护受试者的健康与权利。</li> <li>2.研究开始前，请申请人完成临床研究备案。</li> <li>3.研究过程中若变更主要研究者，对临床研究方案、知情同意书、招募材料等的任何修改，请申请人提交修正案审查申请。</li> <li>4.发生严重不良事件，请申请人及时提交严重不良事件报告。</li> <li>5.请按照伦理委员会规定的年度/定期跟踪查频率，申请人在截止日期前1个月提交研究进展报告；申办者应当向组长单位伦理委员会提交各中心研究进展的汇总报告；当出现任何可能显著影响研究进行或增加受试者危险的情况时，请申请人及时向伦理委员会提交书面报告。</li> <li>6.研究纳入了不符合纳入标准或符合排除标准的受试者，符合中止研究规定而未让受试者退出研究，给予错误治疗或剂量，给予方案禁止的合并用药等没有遵从方案开展研究的情况；或可能对受试者的权益/健康以及研究的科学性造成不良影响等违背伦理原则的情况，请申办者/监查员/研究者提交违背方案报告。</li> <li>7.申请人暂停或提前终止临床研究，请及时提交暂停/终止研究报告。</li> <li>8.完成临床研究，请申请人提交结题报告。</li> </ol> |                                                                                                         |      |        |
| 年度/定期跟踪审查频率                                                                                                                                                                                                                                                                                                                                                                                                                                                                                                                                                                                                                                                                                                      | 12个月                                                                                                    |      |        |
| 有效期                                                                                                                                                                                                                                                                                                                                                                                                                                                                                                                                                                                                                                                                                                              | 2025年6月18日至2026年6月17日                                                                                   |      |        |
| 主任委员签字                                                                                                                                                                                                                                                                                                                                                                                                                                                                                                                                                                                                                                                                                                           |                      |      |        |
| 伦理委员会                                                                                                                                                                                                                                                                                                                                                                                                                                                                                                                                                                                                                                                                                                            | 山东大学齐鲁医院科研伦理委员会（盖章）                                                                                     |      |        |
| 日期                                                                                                                                                                                                                                                                                                                                                                                                                                                                                                                                                                                                                                                                                                               | 2025年6月18日                                                                                              |      |        |
